# Supplementary material for: Lyve-1 deficiency enhances the hepatic immune microenvironment entailing altered susceptibility to melanoma liver metastasis
Source: Springer Nature journal article supplement (doi:10.1186/s12935-022-02800-x), 2022-12-10

# Suppl. Figure 1

## A

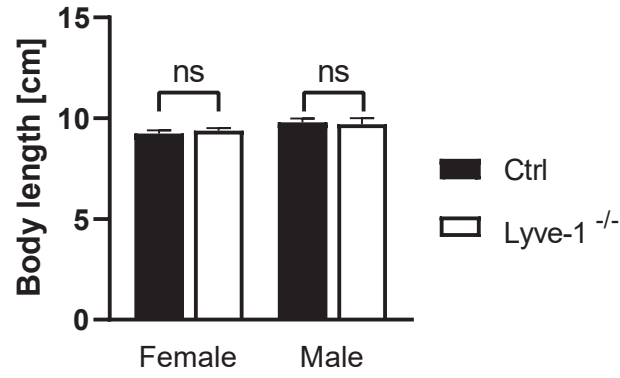

## B

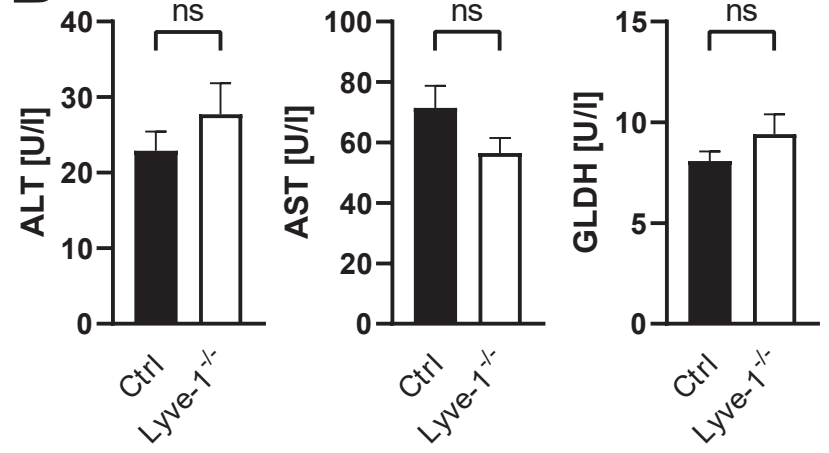

## C

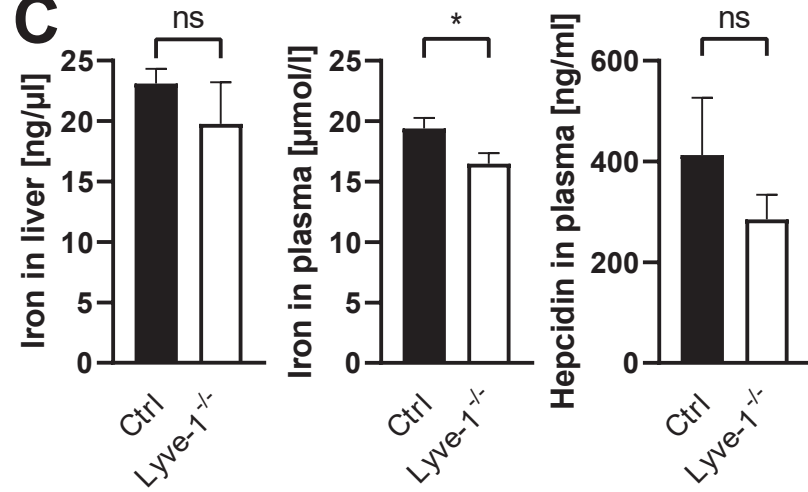

## D

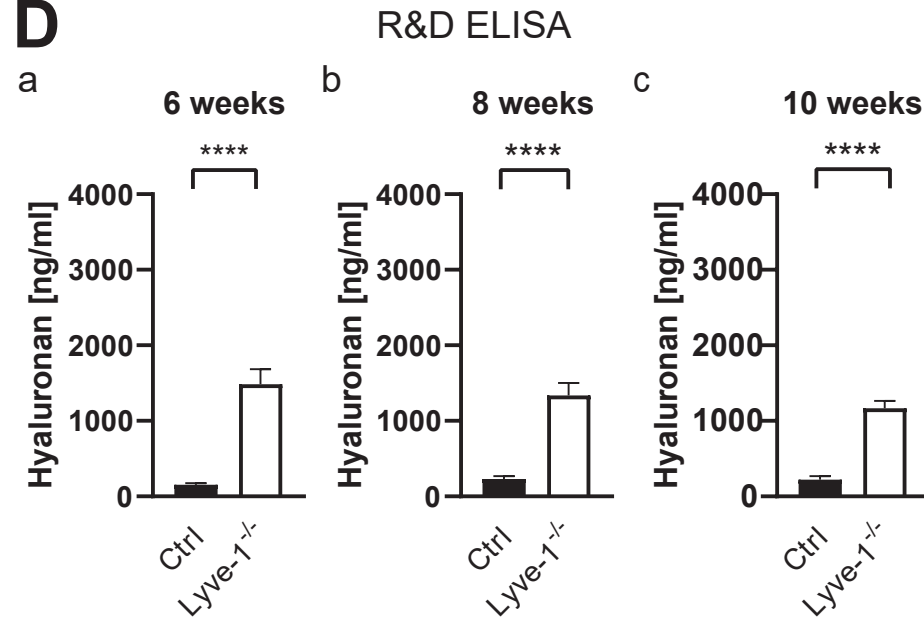

## E

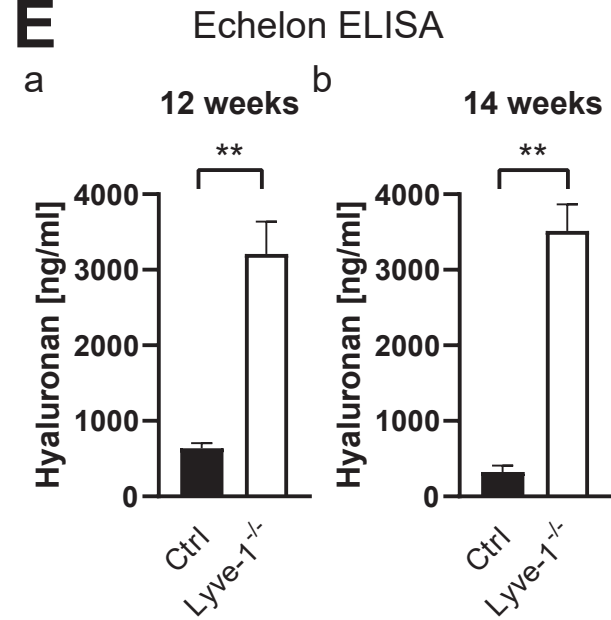

# Suppl. Figure 2

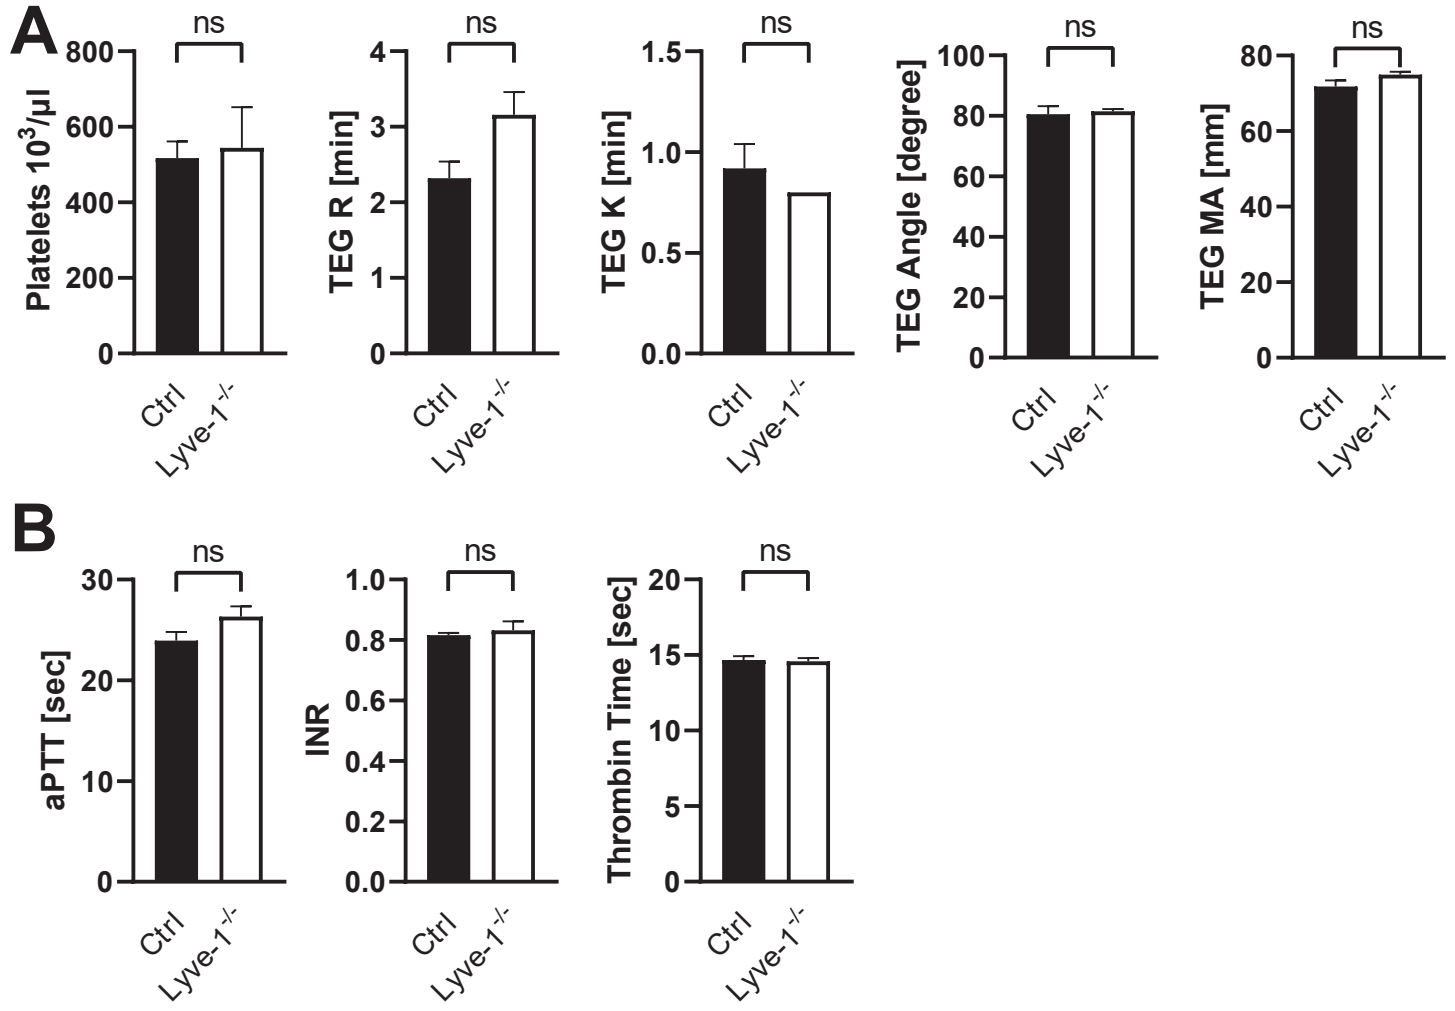

# Suppl. Figure 3

## A

WT31 intrasplenic

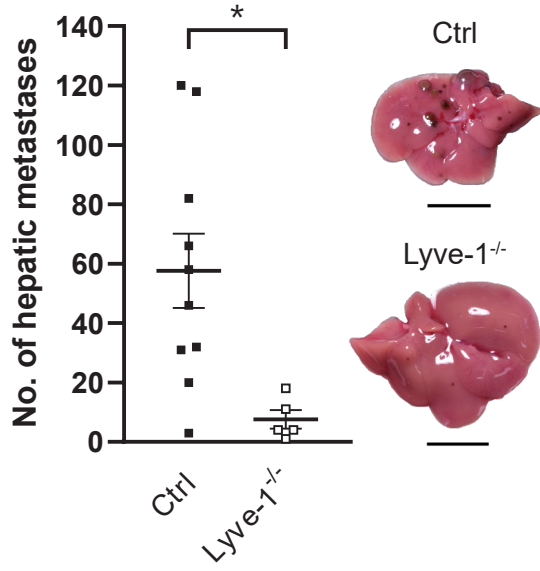

## B

WT31 i.v.

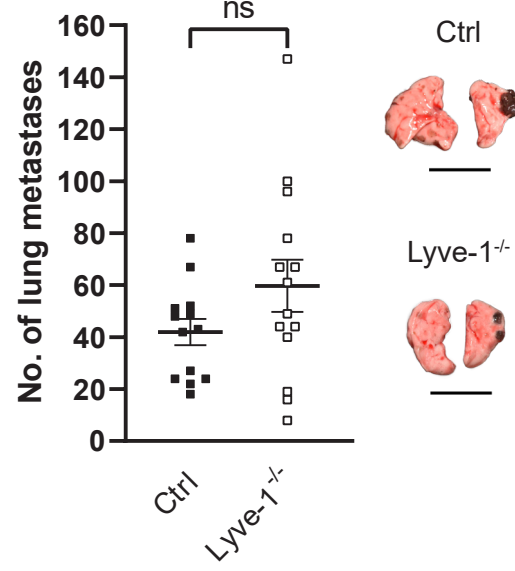

## C

MC38

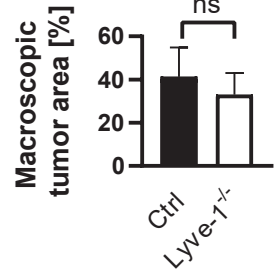

B16F10 *luc2*

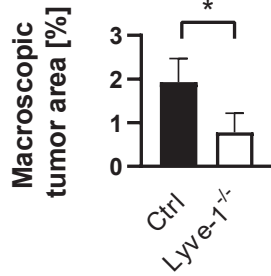

WT31 intrasplenic

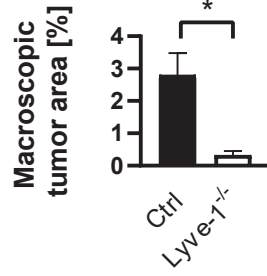

WT31 i.v.

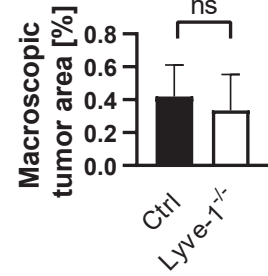

## D

MC38

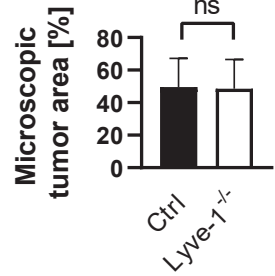

B16F10 *luc2*

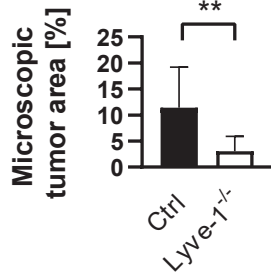

WT31 intrasplenic

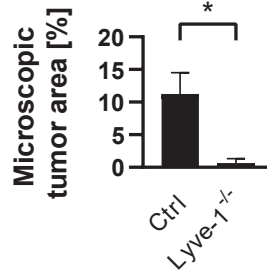

WT31 i.v.

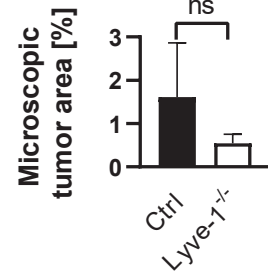

# Suppl. Figure 4

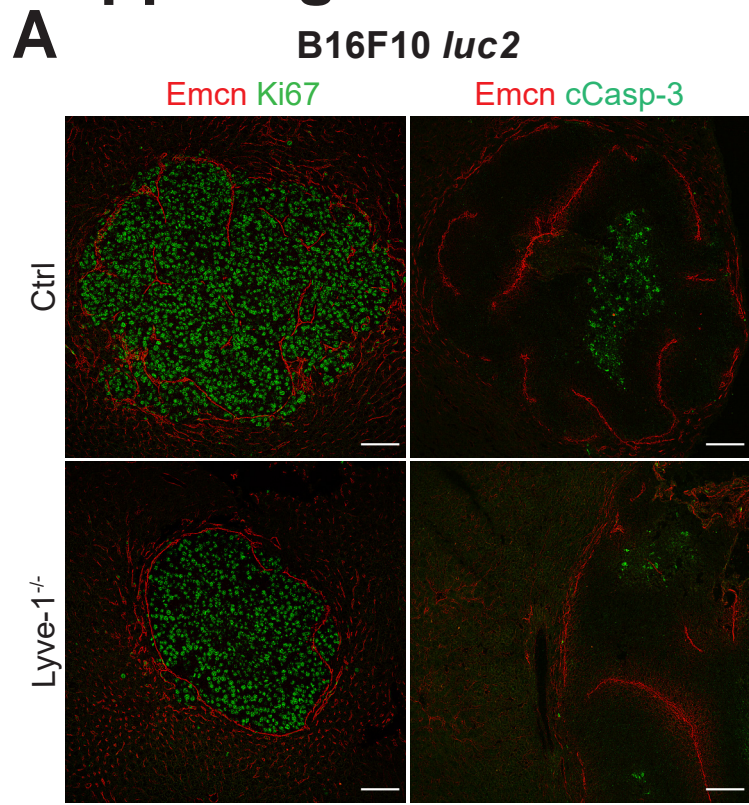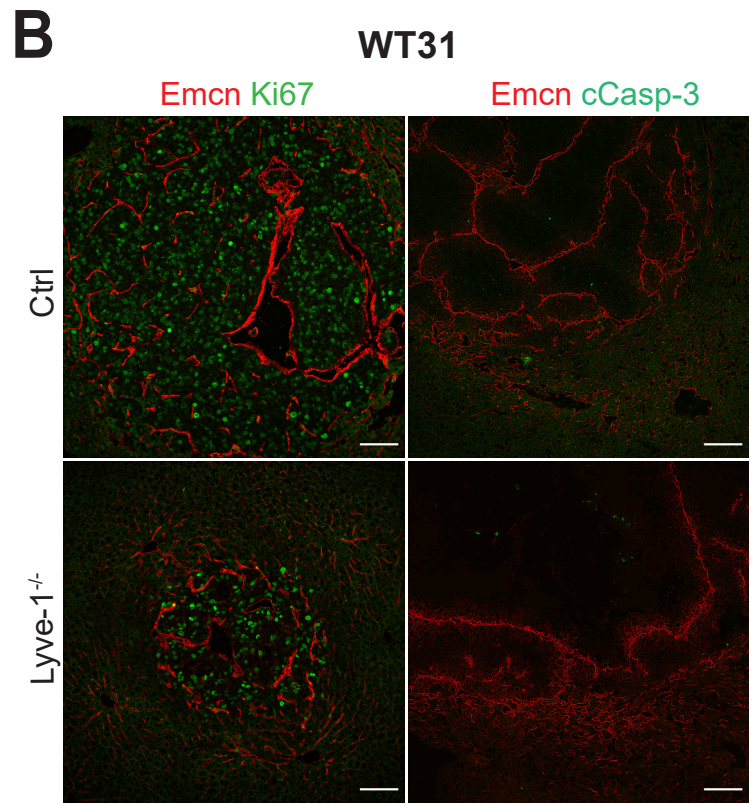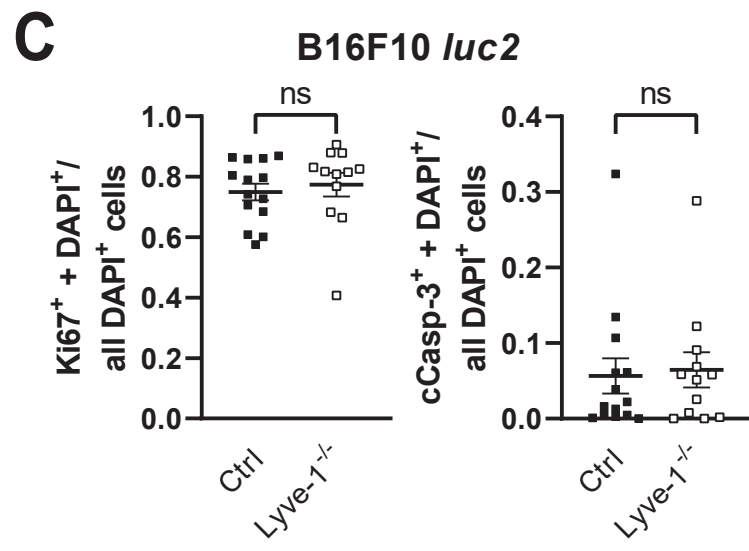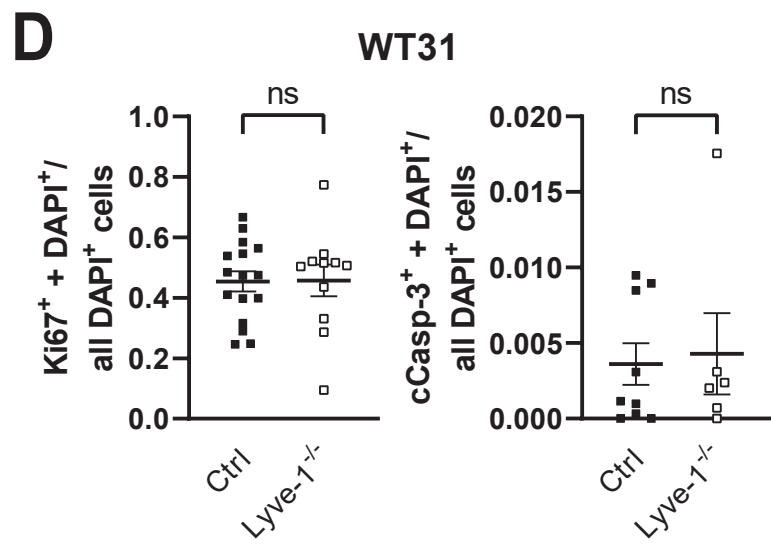



# Suppl. Figure 5

## A Skin wound

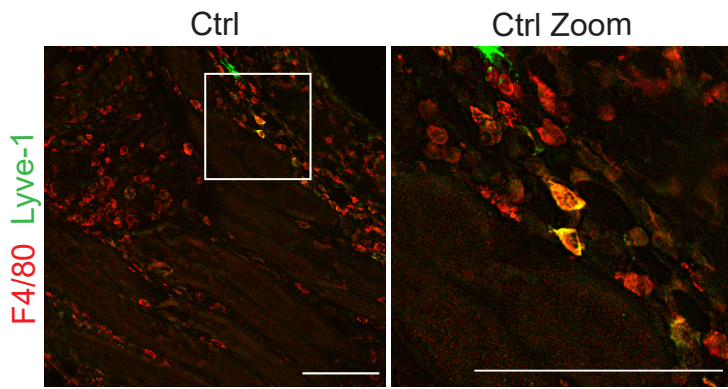

## B Tumor-free livers

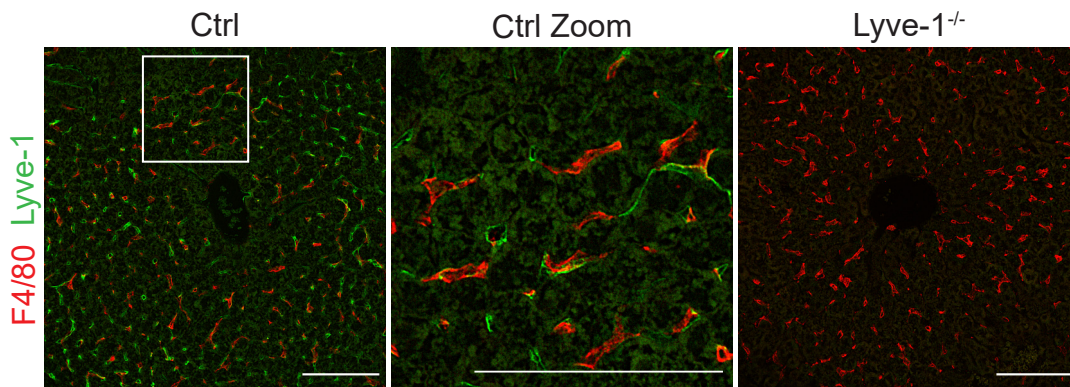

## C B16F10 *luc2*

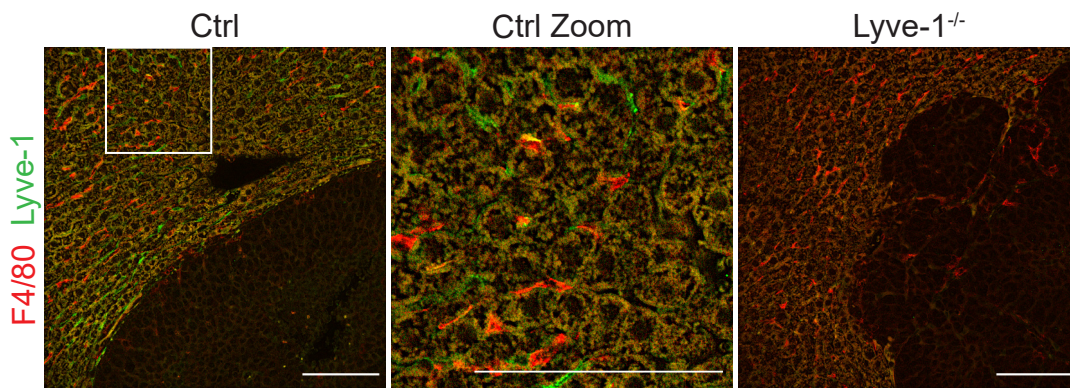

## D WT31

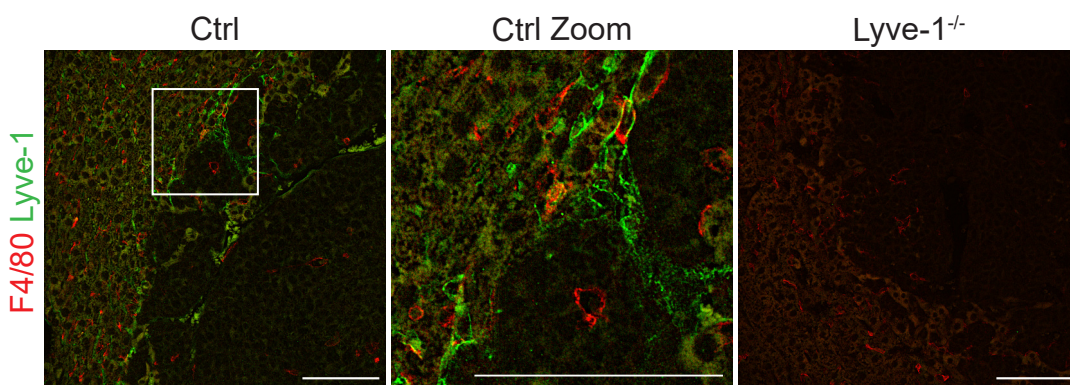

# Suppl. Figure 6

## A

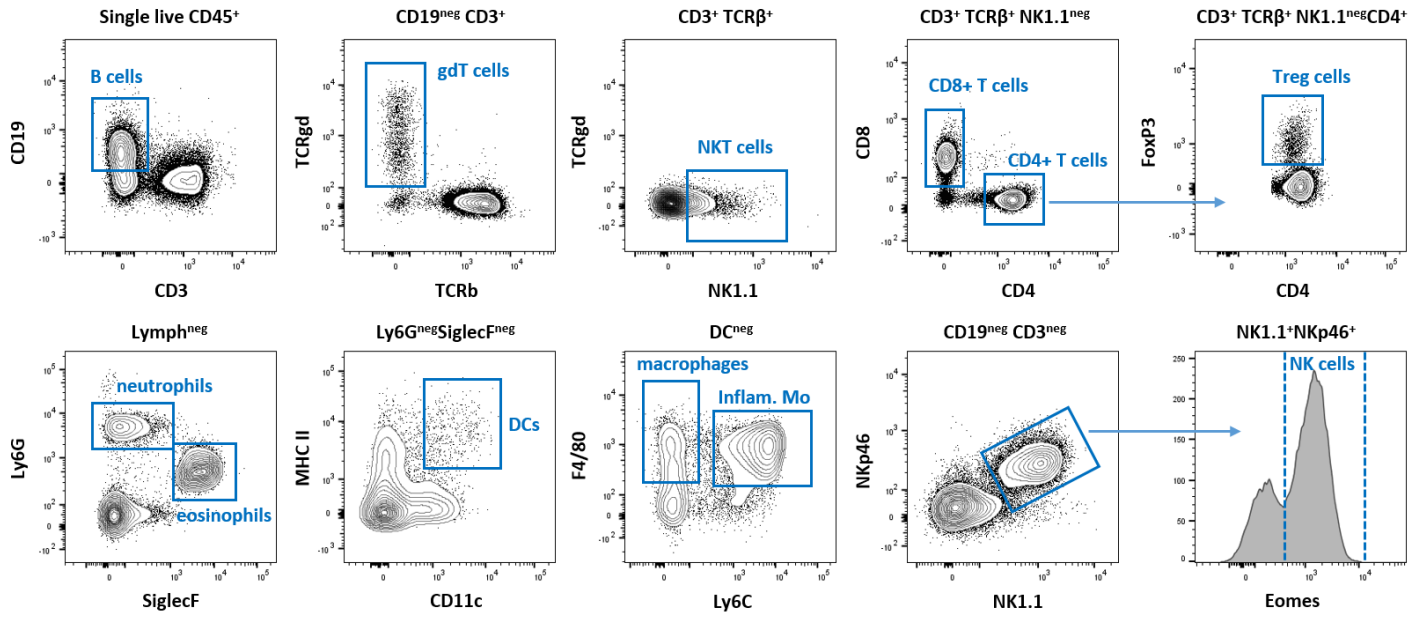

## B Tumor-free livers

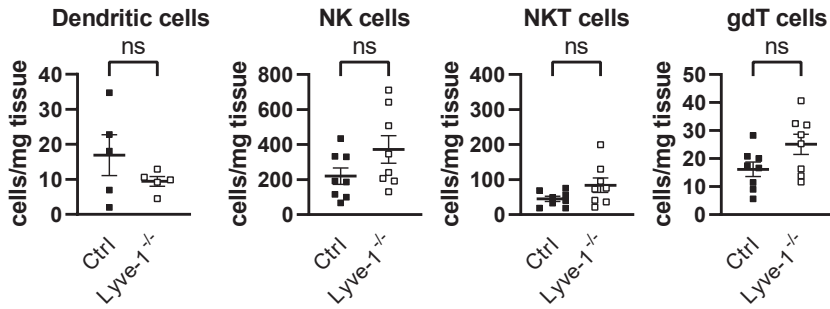

## C B16F10 *luc2*

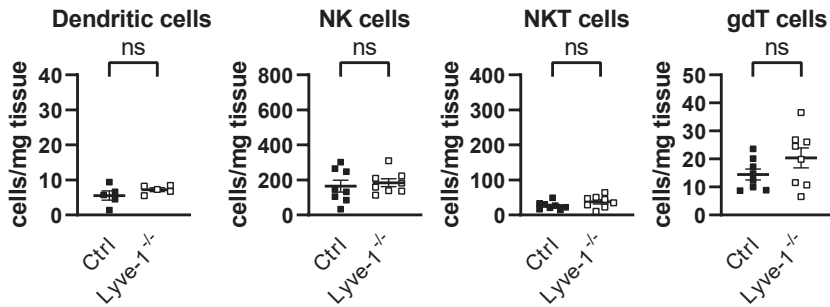

## D WT31

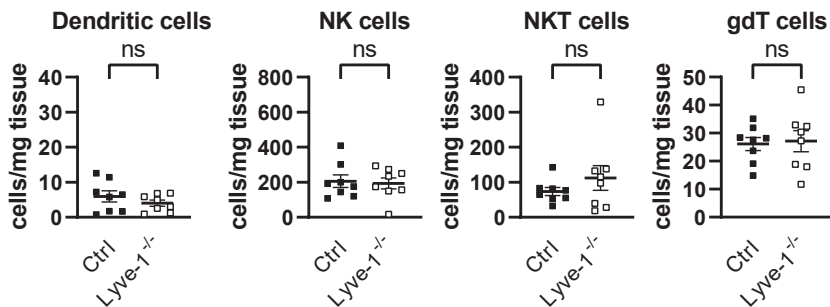



# Suppl. Figure 7

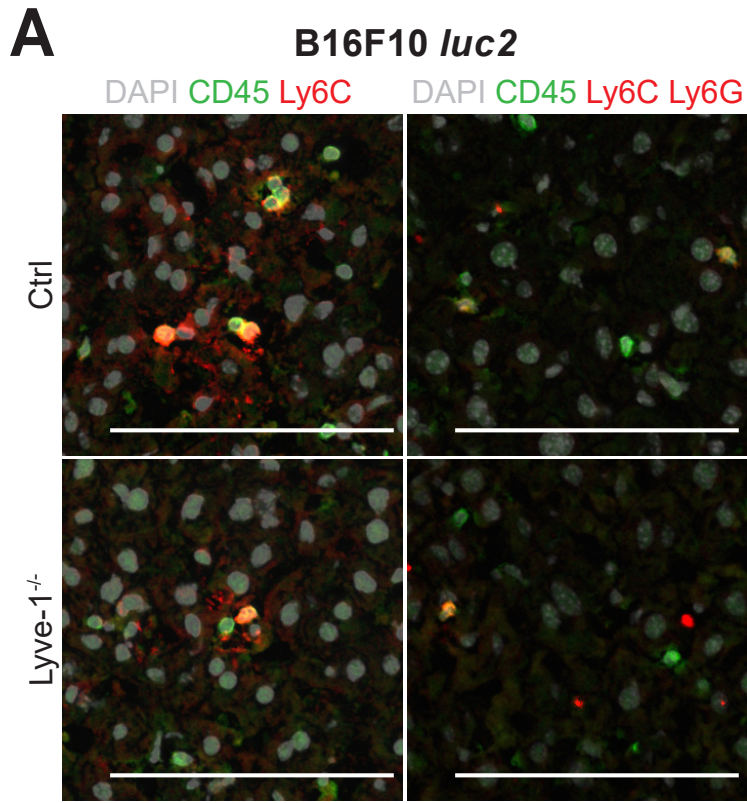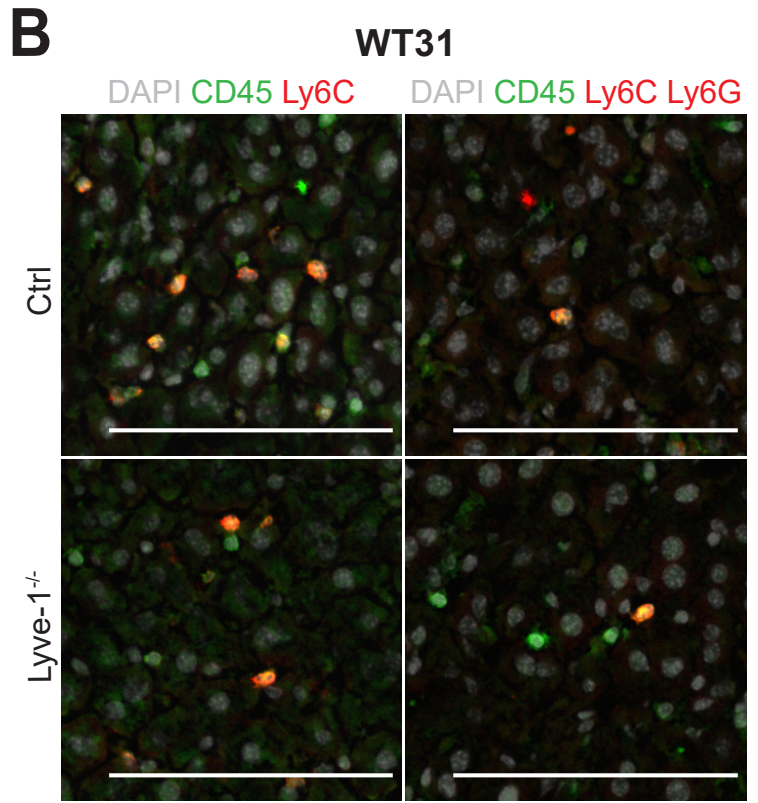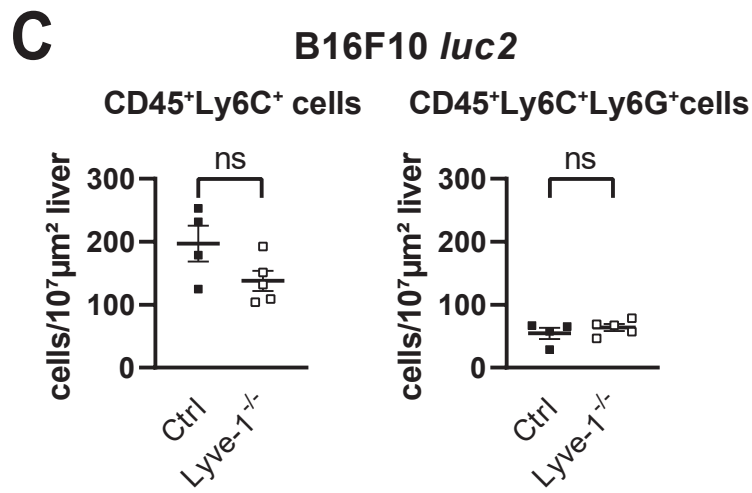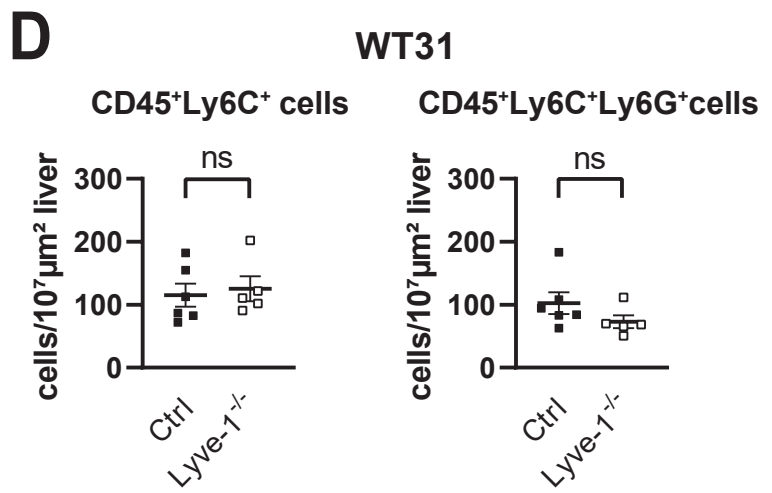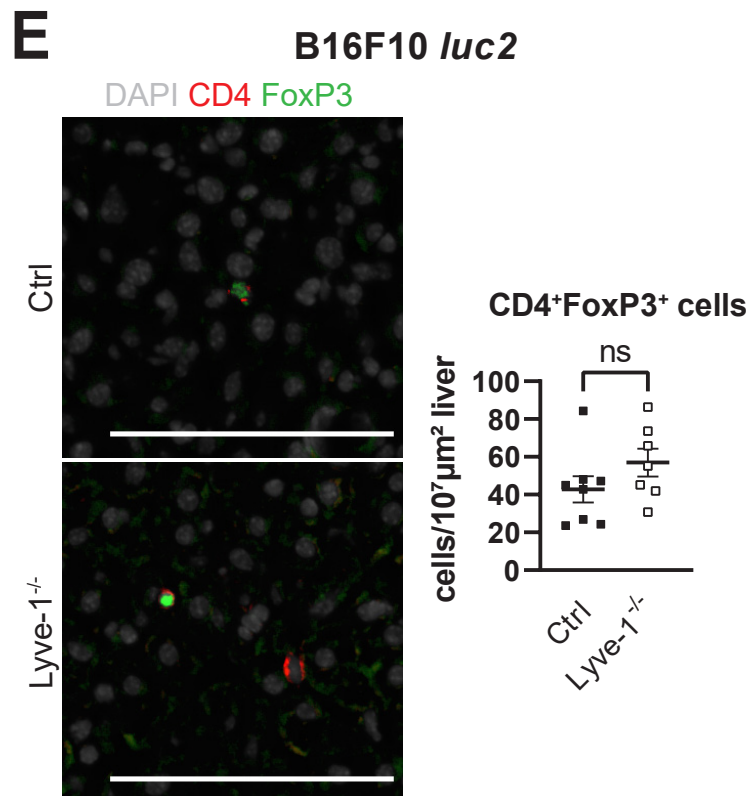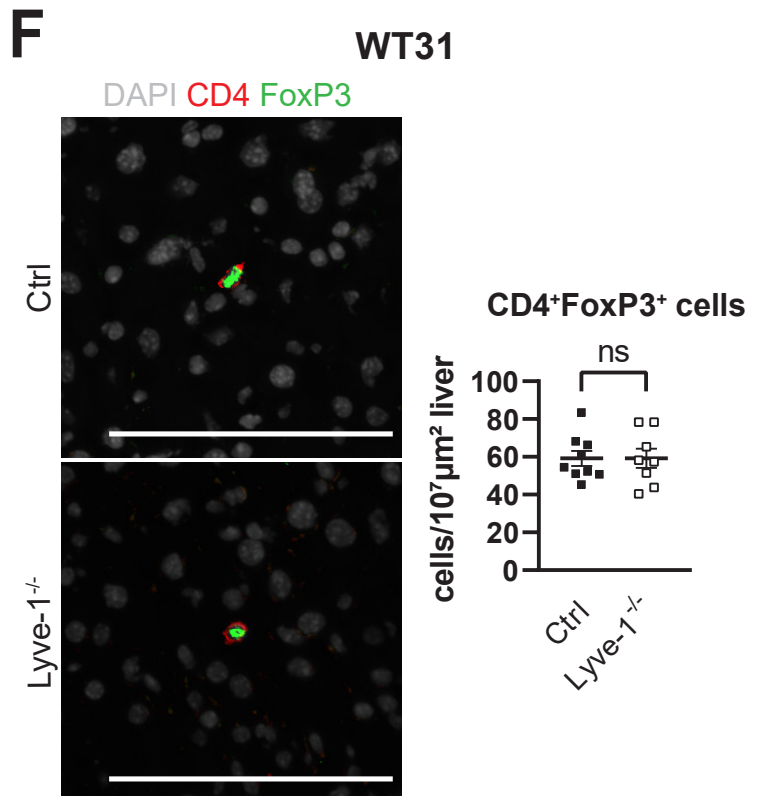

Supplement: MOESM1 [file 23811544]
